# Supplementary material
Source: PubMed Central journal article supplement (PMC2577247)
Supplement: pp.108.129379_2.pdf [file pp.108.129379_2.pdf]

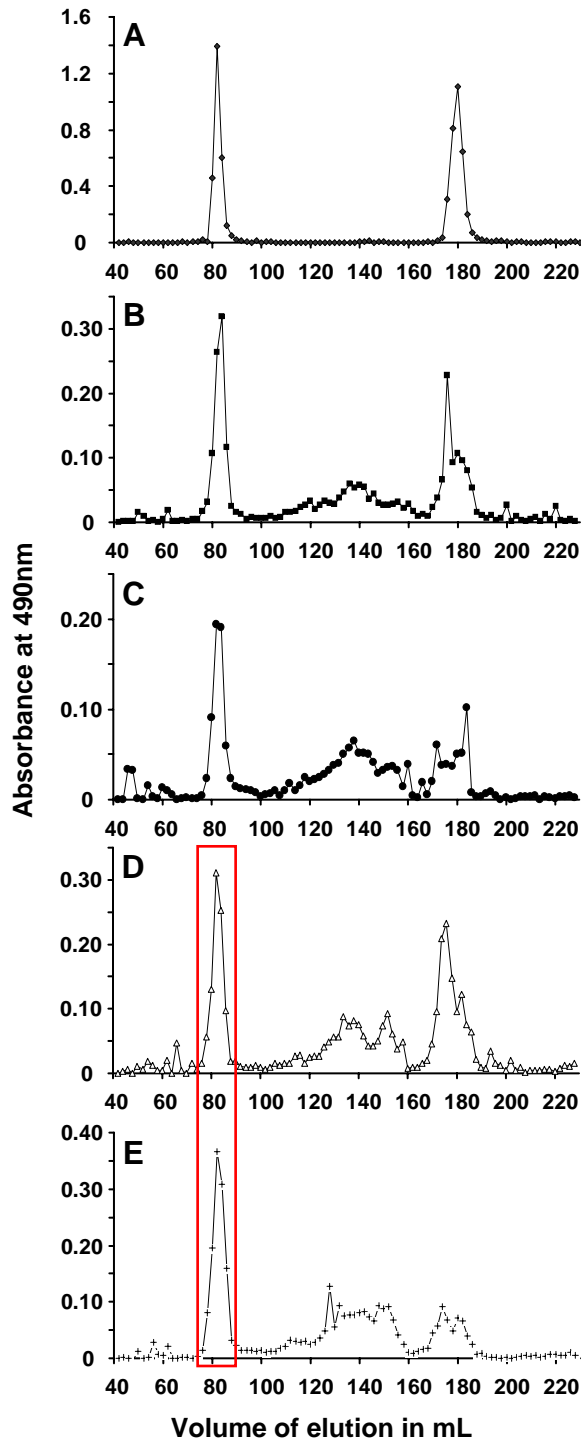

**Supplemental Figure 2:** TSK HW50 profiles of soluble glucans extracted by the perchloric acid method from the *isa1-1 isa3-1 pu1-1* triple mutant cultivated in different lengths of photoperiod. After extraction, WSP were solubilized in DMSO 10% loaded on a TSKHW50 column and detected by phenol-sulfuric acid as described in methods. A: mixture of 2 mg of glycogen + 2 mg of glucose; 3 mg of total soluble glucans were loaded in B, C, D and E.

B: 12h-photoperiod, end of day

C: 12h-photoperiod, end of night

D: 16h-photoperiod, end of day

E: 16h-photoperiod, end of night

Only fractions indicated in the red box (that coelute with glycogen) were further analyzed for CLD as presented in Fig. 8
